# Supplementary material
Source: publisher site journal article supplement (https://kjim.org/upload/media/kjim-2022-326-Supplementary-Fig-2.pdf)
Supplement: Supplementary file 1 [file kjim-2022-326-Supplementary-Fig-2.pdf]

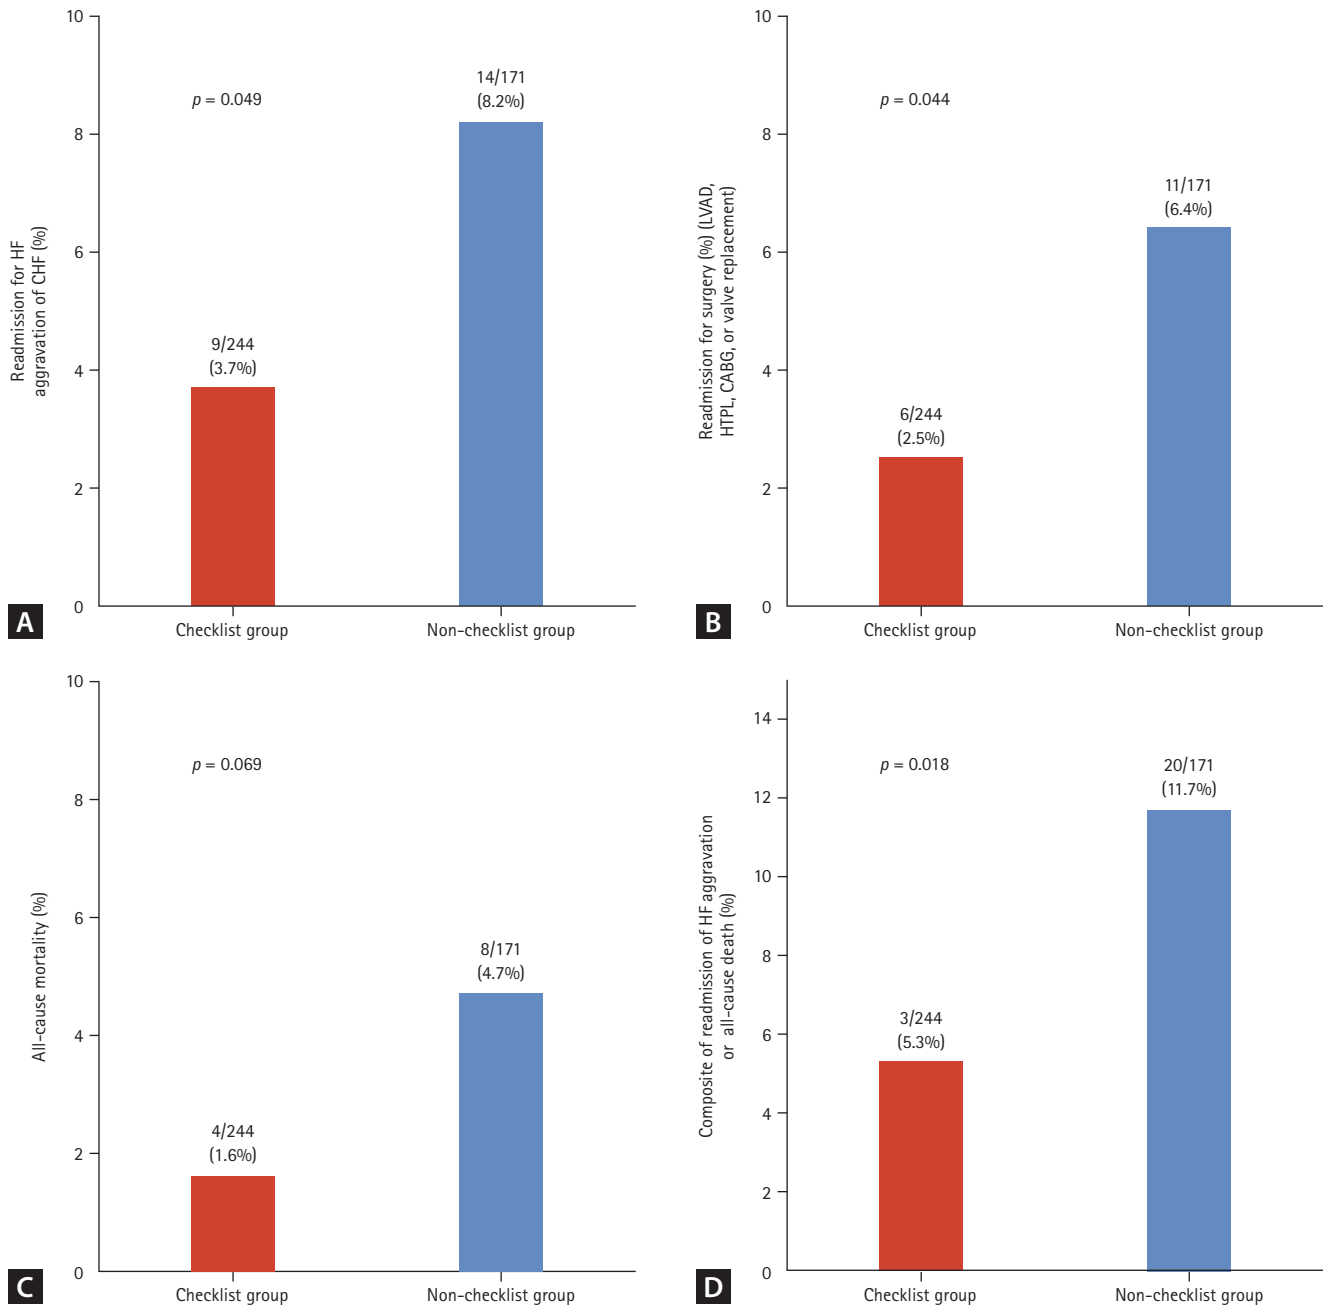

**Supplementary Figure 2.** Two months outcomes of each cardiovascular endpoints. (A) HF rehospitalization rate between two groups. (B) Non-HF related rehospitalization rate between two groups. (C) All-cause mortality rate between two groups. (D) Composite of readmission of HF aggravation or all-cause death rate between two groups. CHF, congestive heart failure; LVAD, left ventricular assisting device; HTPL, heart transplantation; CABG, coronary artery bypass graft; HF, heart failure.
